# Supplementary material
Source: MDPI journal article supplement (https://www.mdpi.com/2073-4352/11/11/1375)
Supplement: s1 [file s1]

# Crystal Structures, Thermal and Luminescent Properties of Gadolinium(III) *trans*-1,4-cyclohexanedicarboxylate Metal-Organic Frameworks

Pavel A. Demakov <sup>1,\*</sup>, Alena A. Vasileva <sup>1,2</sup>, Vladimir A. Lazarenko <sup>3</sup>, Alexey A. Ryadun <sup>1</sup> and Vladimir P. Fedin <sup>1</sup>

<sup>1</sup> Nikolaev Institute of Inorganic Chemistry, Siberian Branch of the Russian Academy of Sciences, Novosibirsk 630090, Russia

<sup>2</sup> Department of Natural Sciences, Novosibirsk State University, Novosibirsk 630090, Russia

<sup>3</sup> National Research Centre “Kurchatov Institute”, Moscow 123182, Russia; vladimir.a.lazarenko@gmail.com

\* Correspondence: demakov@niic.nsc.ru

## Supplementary Information

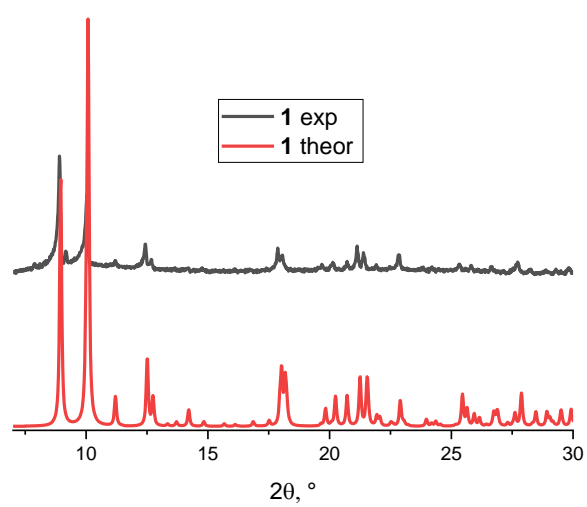

**Figure S1.** Experimental PXRD pattern for **1** compared to the theoretical one.

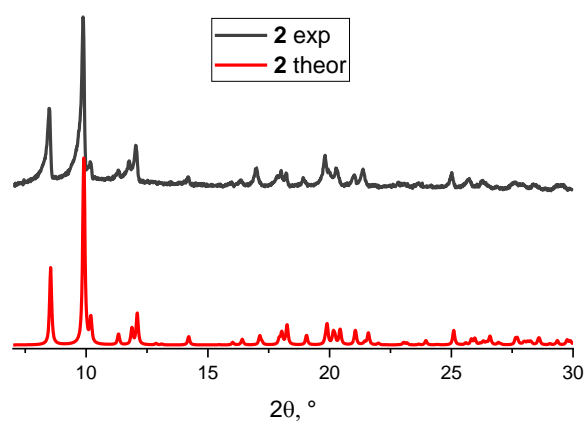

**Figure S2.** Experimental PXRD pattern for **2** compared to the theoretical one.

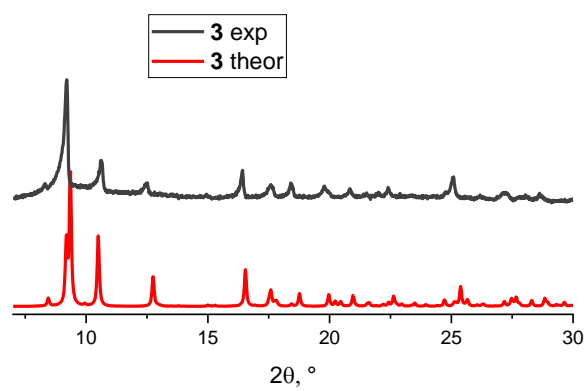

**Figure S3.** Experimental PXRD pattern for **3** compared to the theoretical one.

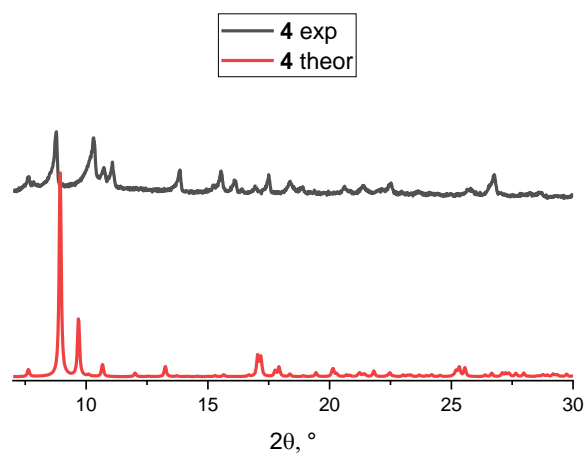

**Figure S4.** Experimental PXRD pattern for **4** compared to the theoretical one.

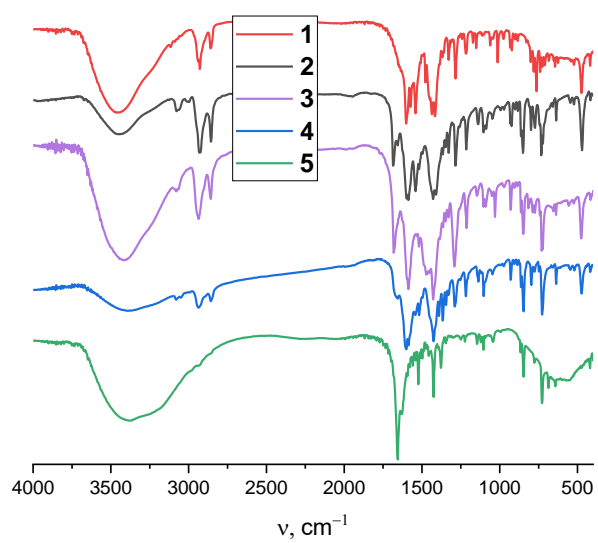

**Figure S5.** IR spectra for **1** – **5**
